# Supplementary material for: Evaluation of the effect of video tutorial training on improving pharmacy students’ knowledge and skills about medication reconciliation
Source: PubMed Central journal article supplement — Pharm Pract (Granada). 2020 Mar 5;18(1):1711. doi: 10.18549/PharmPract.2020.1.1711 (PMC7075426; doi:10.18549/pharmpract.2020.1.1711), 2020-03-05
Supplement: pharmpract-18-1711-suppl.pdf [file pharmpract-18-1711-suppl.pdf]

### Online Appendix. Assessment of Students' Knowledge Regarding the Medication Reconciliation Process

For each of the following statements, select all correct options regarding medication reconciliation.

#### 1. Medication reconciliation

- a) Is the process of reporting adverse drug reaction to the authorized organization.
- b) **Is a formalized, interactive and multi-professional process guaranteeing the accurate and complete medication information transfer at interfaces of care**
- c) Is a simple interview of the patient
- d) Is the process of providing patient counselling about risky medications
- e) Is the process of ensuring appropriate use of abbreviations while writing medications in the hospital setting.

#### 2. Medication reconciliation can be achieved:

- a) At the patient admission
- b) During an internal transfer at hospital
- c) At the discharge of the patient from hospital to home
- d) At the discharge of the patient from hospital to another hospital
- e) **At all of these transition of care points**

#### 3. Which of the following types of medication discrepancies is considered a medication errors

- a) **Unintentional discrepancy**
- b) Intentional discrepancy
- c) Both

#### 4. An unintentional discrepancy may correspond to:

- a) Omission of the drug usually taken by the patient
- b) Drug dosage higher than dosage usually prescribed
- c) Addition of a new drug on the admission drug prescription
- d) Drug dosage lower than the dosage usually prescribed
- e) **All of these**

#### 5. What are the sources of information during the reconciliation process?

- a) The patient
- b) The physician
- c) Family member/caregiver
- d) Medication list
- e) Community pharmacy profile
- f) **All of these are correct**

#### 6. To formalize a Best Possible Medication History (BPMH), it is best to consult

- a) Only one source of information
- b) **At least 2 sources of information**
- c) At least 3 sources of information
- d) At least 3 sources of information
- e) All sources are needed

**7. When collecting Best Possible Medication History (BPMH), we should collect information about**

- a) Prescription medication
- b) OTC medication
- c) Complementary herbal medicine
- d) Vitamins and supplements
- e) All of these

**8. Who can be involved in the medication reconciliation process**

- a) Nurses
- b) Physicians
- c) Pharmacists
- d) Pharmacy technicians
- e) All of them should be involved in medication reconciliation implementation

**9. Ideally medication reconciliation process should be provided by**

- a) Nurses
- b) Physicians
- c) Pharmacists
- d) Students
- e) Pharmacy technicians

**10. List the four steps of medication reconciliation:**

1. \_\_\_\_\_
2. \_\_\_\_\_
3. \_\_\_\_\_
4. \_\_\_\_\_

### Students Satisfaction with Medication Reconciliation and Education Services (post educational video only)

For each statement below rate how strongly you agree or disagree, using the scale provided. **Try to answer each question as carefully and honestly as you can.**

| No. | Statements                                                                                | Strongly disagree        | Disagree                 | Neutral                  | Agree                    | Strongly agree           |
|-----|-------------------------------------------------------------------------------------------|--------------------------|--------------------------|--------------------------|--------------------------|--------------------------|
| 1   | The educational video stimulated my interest in medication reconciliation.                | <input type="checkbox"/> |
| 2   | Methods of medication reconciliation introduced in this educational video are beneficial. | <input type="checkbox"/> |
| 3   | I enjoyed participating in this education training using video                            | <input type="checkbox"/> |
| 4   | The educational video was easy to follow and understand                                   | <input type="checkbox"/> |
| 5   | The educational video made me understand the concept of medication reconciliation         | <input type="checkbox"/> |
| 6   | The educational video help me understand the importance of medication reconciliation      | <input type="checkbox"/> |
| 7   | The educational video clarified what is Best Possible Medication History (BPMH)           | <input type="checkbox"/> |
| 8   | The educational video clarified how to collect BPMH perfectly                             | <input type="checkbox"/> |
| 9   | The educational training video helped me to be able to identify medication discrepancies. | <input type="checkbox"/> |
| 10  | Overall, the educational training video enhanced my learning.                             | <input type="checkbox"/> |
